# Supplementary material for: Comparative transcriptome analysis of genes involved in the drought stress response of two peanut (Arachis hypogaea L.) varieties
Source: BMC Plant Biol. 2021 Jan 27;21:64. doi: 10.1186/s12870-020-02761-1 (PMC7839228; doi:10.1186/s12870-020-02761-1)
Supplement: Supplementary file 9 — Additional file 9: Table S8. The peanut varieties used in the experiment. This table provides detailed information on the peanut varieties used in the experiment. [file 12870_2020_2761_MOESM9_ESM.xlsx]

## Sheet: Sheet2
Variety name	Approved year	Examination and approval institution	Record No
HY20	2002	National Crop Variety Approval Committee	2002015（Nation）
FH12	2018	Ministry of Agriculture and Rural Affairs of the People's Republic of China	（2018）210203（Nation）
FH18	2018	Ministry of Agriculture and Rural Affairs of the People's Republic of China	（2018）210201（Nation）
FH23	2018	Ministry of Agriculture and Rural Affairs of the People's Republic of China	（2018）210205（Nation)
FH24	2018	Ministry of Agriculture and Rural Affairs of the People's Republic of China	（2018）210206（Nation)
NH5	2011	Liaoning Provincial non-major crop Variety Approval Committeee	（2010）58（Liaoning Province）
NH11	2013	Liaoning Provincial non-major crop Variety Approval Committeee	（2012）78（Liaoning Province）
NH13	2013	Liaoning Provincial non-major crop Variety Approval Committeee	（2012）79（Liaoning Province）
NH14	2015	Liaoning Provincial non-major crop Variety Approval Committeee	2014019（Liaoning Province）
NH15	2015	Liaoning Provincial non-major crop Variety Approval Committeee	2014006（Liaoning Province）
NH16	2015	Liaoning Provincial non-major crop Variety Approval Committeee	2014011（Liaoning Province）
NH18	2016	Liaoning Provincial non-major crop Variety Approval Committeee	2015008（Liaoning Province）
NH19	2016	Liaoning Provincial non-major crop Variety Approval Committeee	2015007（Liaoning Province）
BS1016	1984	Crop Variety Approval Committee of Anhui Province	（Anhui Province）
TY4	1994	Crop Variety Approval Committee of Hebei Province	3323（ Hebei Province）
HY22	2003	Shandong Approval Committee of Crop Variety	（2003）016（Shandong Province）
NH8	2018		under review
NH9	2018		under review
NH12	2018		under review
NH20	2018		under review
NH21	2018		under review
NH22	2018		under review
NH23	2018		under review
